# Supplementary material
Source: HighWire-hosted journal article supplement (doi:10.1101/rna.032540.112)
Supplement: SuppLegends.docx [file SuppLegends.docx]

**SUPPLEMENTARY FIGURE 1. 60S ribosomal subunits decrease and halfmer polyribosomes form 4 hours after depletion of L8**

Yeast strain TY1097 (*GAL-RPL8)* was grown in YEPGal or shifted to YEPGlu for 4

hours. Sucrose gradient fractionations were performed as described in Fig. 1B.

**SUPPLEMENTARY FIGURE 2. A3 assembly factors and r-proteins are missing from pre-ribosomes within 4 hours after depleting L7 or L8**

**(A)** Extracts were prepared from JWY8492 (*GAL-RPL7 RPF2-TAP)* and JWY8591 (*GAL-RPL8 RPF2-TAP)* strains grown in YEPGal or shifted from YEPGal to YEPGlu for 4 and 16h. Pre-ribosomes were affinity-purified from extracts of each strain using IgG-coated Dynabeads. Proteins were recovered from the eluates of purifications by TCA precipitation, resolved by SDS gel electrophoresis on 4%-20% Novex gels, and stained with silver. **(B)** Western analysis of changes in preribosomal proteins upon depletion of L7 or L8 for 4 and 16 hours. As described (A) above, proteins from pre-ribosomes purified from L7 or L8 depleted yeast were resolved by SDS-PAGE, transferred to nitrocellulose membranes, and detected using antibodies against specific proteins or with antisera against epitope tags attached to proteins. Each blot was cut into small sections based on the known mobility of each protein. For each protein shown, controls confirmed equal loading on the gel.

**SUPPLEMENTARY FIGURE 3. Analysis of changes in composition of pre-ribosomes upon depletion of L8**

Yeast strains TY1769 (*GAL-RPL8 NOC2-TAP*) and TY1879 (*NOC2-TAP*) were grown at 30°C in galactose containing medium (YEPGal), and then cultivated for 5 hours in glucose containing medium (YEPGlu). Whole cell extracts were prepared and TAP-tagged Noc2p was affinity-purified as described in Materials and Methods. Purified proteins were subjected to iTRAQ analysis. The relative abundance of ribosome assembly factors (top), and r-proteins (bottom) is shown as the ratio of those from L8 depleted cells to those from cells expressing L8.

**SUPPLEMENTARY TABLE I.** Yeast strains used in this study

**SUPPLEMENTARY TABLE II. Assembly factors and ribosomal proteins in 66S pre-ribosomes affected by depletion of L8.** Changes in levels of assembly factors and ribosomal proteins based on iTRAQ, silver staining and western blotting of purified pre-ribosomes before and after depletion of L8 are listed.
