# Supplementary material
Source: HighWire-hosted journal article supplement (doi:10.1101/rna.032540.112)
Supplement: Supplementary_Table_I.docx [file Supplementary_Table_I.docx]

**Supplementary Table I.** Yeast strains used in this study

| Strain | Genotype | Source |
| --- | --- | --- |
| BY4741 | *MATa his3∆1 leu2∆0 ura3∆0 met15∆0* | Euroscarf |
| TY1097 | *MATa his3∆1 leu2∆0 ura3∆0 met15∆0 rpl8a::HIS3MX6 rpl8b::KANMX4 pGAL-RPL8B* | Pöll et al. 2009 |
| TY1769 | *MATa his3∆1 leu2∆0 ura3∆0 met15∆0 rpl8a::HIS3MX6 rpl8b::KANMX4 pGAL-RPL8B* *noc2::NOC2-TAP URA3* | This work |
| TY1879 | *MATa his3∆1 leu2∆0 ura3∆0 met15∆0* *noc2::NOC2-TAP URA3* | This work |
| JWY6147 | *MATa ura3-52 trp1-1 lys2-801 his3-∆200 leu2-∆1* | Dr. Elizabeth Jones |
| JWY7148 | *MATa his3∆1 leu2∆0 ura3∆0 met15∆0 rpl7a::RPL7A-TAP HIS3* | Euroscarf |
| JWY7158 | *MATa his3∆1 leu2∆0 ura3∆0 met15∆0 rpl8a::RPL8A-TAP HIS3* | Euroscarf |
| JWY7771 | *MATa ura3-52 trp1-1 lys2-801 his3-∆200 leu2-∆1 rpl7b::KANMX6* | This study |
| JWY8309 | *MATa ura3-52 trp1-1 lys2-801 his3-∆200 leu2-∆1 rpf2::RPF2-TAP URA3* | Sahasranaman et al. 2011 |
| JWY8423 | *MATa ura3-52 trp1-1 lys2-801 his3-∆200 leu2-∆1rpl7b::KANMX6 rpl7a::GAL-HA3-RPL7A TRP1* | Pöll et al. 2009 |
| JWY8492 | *MATa ura3-52 trp1-1 lys2-801 his3-∆200 leu2-∆1rpl7b::KANMX6 rpl7a::GAL-HA3-RPL7A TRP1 RPF2-TAP URA3* | This study |
| JWY8493 | *MATa his3∆1 leu2∆0 ura3∆0 met15∆0 rpl8a::HIS3MX6 rpl8b::KANMX4 pGAL-RPL8B RPF2-TAP URA3* | This study |
| JWY8559 | *MATa his3∆1 leu2∆0 ura3∆0 met15∆0 rpl8a::HIS3MX6 rpl8b::KANMX4 pGAL-RPL8B pRS316-RPL25eGFP* | This study |
| JWY8561 | *MATa ura3-52 trp1-1 lys2-801 his3-∆200 leu2-∆1 rpl8a::kANMX6* | This study |
| JWY8563 | *MATa ura3-52 trp1-1 lys2-801 his3-∆200 leu2-∆1 rpl8a::KANMX6 rpf2::RPF2-TAP URA3* | This study |
| JWY8564 | *MATa ura3-52 trp1-1 lys2-801 his3-∆200 leu2-∆1rpl7b::KANMX6 rpl7a::GAL-HA3-RPL7A TRP1 RPF2-TAP URA3 rpl26b::RPL26B-HA3 HIS3* | This study |
| JWY8565 | *MATa ura3-52 trp1-1 lys2-801 his3-∆200 leu2-∆1rpl7b::KANMX6 rpl7a::GAL-HA3-RPL7A TRP1 RPF2-TAP URA3 rpl37b::RPL37B-HA3 HIS3* | This study |
| JWY8568 | *MATa ura3-52 trp1-1 lys2-801 his3-∆200 leu2-∆1 rpl8b::KANMX6* | This study |
| JWY8570 | *MATa ura3-52 trp1-1 lys2-801 his3-∆200 leu2-∆1 rpl8b::KANMX6 rpf2::RPF2-TAP URA3* | This study |
| JWY8572 | *MATa ura3-52 trp1-1 lys2-801 his3-∆200 leu2-∆1rpl7b::KANMX6 rpl7a::GAL-HA3-RPL7A TRP1 RPF2-TAP URA3 rpl35b::RPL35B-HA3 HIS3* | This study |
| JWY8591 | *MATa ura3-52 trp1-1 lys2-801 his3-∆200 leu2-∆1 rpf2::RPF2-TAP URA3 rpl8a::KANMX6 rpl8b::GAL-HA3-RPL8B HIS3* | This study |
| JWY8592 | *MATa ura3-52 trp1-1 lys2-801 his3-∆200 leu2-∆1rpl7b::KANMX6 rpl7a::GAL-HA3-RPL7A TRP1 pRS316-RPL25eGFP URA3* | This study |
| JWY8593 | *MATa ura3-52 trp1-1 lys2-801 his3-∆200 leu2-∆1 rpf2::RPF2-TAP URA3 rpl8a::KANMX6 rpl8b::GAL-HA3-RPL8B HIS3 pRS314-RPL25eGFP TRP1* | This study |
| JWY8599 | *MATa ura3-52 trp1-1 lys2-801 his3-∆200 leu2-∆1 rpf2::RPF2-TAP URA3 rpl8a::KANMX6 rpl8b::GAL-HA3-RPL8B HIS3 erb1::ERB1-HA3 TRP1* | This study |
| JWY8600 | *MATa ura3-52 trp1-1 lys2-801 his3-∆200 leu2-∆1 rpf2::RPF2-TAP URA3 rpl8a::KANMX6 rpl8b::GAL-HA3-RPL8B HIS3 rpl26b::RPL26B-HA3 TRP1* | This study |
| JWY9632 | *MATa ura3-52 trp1-1 lys2-801 his3-∆200 leu2-∆1rpl7b::KANMX6 rpl7a::GAL-HA3-RPL7A TRP1 RPF2-TAP URA3 erb1::ERB1-HA3 HIS3* | This study |
| JWY9804 | *MATa ura3-52 trp1-1 lys2-801 his3-∆200 leu2-∆1 rpf2::RPF2-TAP URA3 rpl8a::KANMX6 rpl8b::GAL-HA3-RPL8B HIS3 rpl35b::RPL35B-HA3 TRP1* | This study |
| JWY9808 | *MATa ura3-52 trp1-1 lys2-801 his3-∆200 leu2-∆1 rpf2::RPF2-TAP URA3 rpl8a::KANMX6 rpl8b::GAL-HA3-RPL8B HIS3 rpl37b::RPL37B-HA3 TRP1* | This study |
| JWY9813 | *MATa ura3-52 trp1-1 lys2-801 his3-∆200 leu2-∆1 rpf2::RPF2-TAP URA3 rpl8a::KANMX6 rpl8b::GAL-HA3-RPL8B HIS3 ytm1::YTM1-HA3 TRP1* | This study |
| JWY9824 | *MATa ura3-52 trp1-1 lys2-801 his3-∆200 leu2-∆1 rpf2::RPF2-TAP URA3 rpl8a::KANMX6 rpl8b::GAL-HA3-RPL8B HIS3 rpl15b::RPL15B-13MYC TRP1* | This study |
| JWY9825 | *MATa ura3-52 trp1-1 lys2-801 his3-∆200 leu2-∆1 rpf2::RPF2-TAP URA3 rpl8a::KANMX6 rpl8b::GAL-HA3-RPL8B HIS3 rpl15b::RPL7B-13MYC TRP1* | This study |
| JWY9832 | *MATa ura3-52 trp1-1 lys2-801 his3-∆200 leu2-∆1rpl7b::KANMX6 rpl7a::GAL-HA3-RPL7A TRP1 rrp5::RRP5-TAP URA3* | This study |
| JWY9835 | *MATa his3∆1 leu2∆0 ura3∆0 met15∆0 rpl8a::HIS3MX6 rpl8b::KANMX4 pGAL-RPL8B rrp5::RRP5-TAP URA3* | This study |
| JWY9836 | *MATa ura3-52 trp1-1 lys2-801 his3-∆200 leu2-∆1rpl7b::KANMX6 rpl7a::GAL-HA3-RPL7A TRP1 RPF2-TAP URA3 rpl28::RPL28-13MYC HIS3* | This study |
| JWY9837 | *MATa ura3-52 trp1-1 lys2-801 his3-∆200 leu2-∆1 rpf2::RPF2-TAP URA3 rpl8a::KANMX6 rpl8b::GAL-HA3-RPL8B HIS3 rpl28::RPL28-13MYC HIS3* | This study |
| JWY9838 | *MATa ura3-52 trp1-1 lys2-801 his3-∆200 leu2-∆1rpl7b::KANMX6 rpl7a::GAL-HA3-RPL7A TRP1 RPF2-TAP URA3 rpl9a::RPL9A-13MYC HIS3* | This study |
| JWY9839 | *MATa ura3-52 trp1-1 lys2-801 his3-∆200 leu2-∆1 rpf2::RPF2-TAP URA3 rpl8a::KANMX6 rpl8b::GAL-HA3-RPL8B HIS3 rpl9a::RPL9A-13MYC HIS3* | This study |
| JWY9840 | *MATa ura3-52 trp1-1 lys2-801 his3-∆200 leu2-∆1 rpf2::RPF2-TAP URA3 rpl8a::KANMX6 rpl8b::GAL-HA3-RPL8B HIS3 rpl21a::RPL21A-13MYC HIS3* | This study |
| JWY9843 | *MATa ura3-52 trp1-1 lys2-801 his3-∆200 leu2-∆1rpl7b::KANMX6 rpl7a::GAL-HA3-RPL7A TRP1 RPF2-TAP URA3 rpl21a::RPL21A-13MYC HIS3* | This study |
| JWY9878 | *MATa his3∆1 leu2∆0 ura3∆0 met15∆0 rpl7a::KANMX6* | Euroscarf |
